# Supplementary material for: Slow magnetic relaxation in a trigonal-planar mononuclear Fe(ii) complex
Source: Royal Society of Chemistry journal article supplement (doi:10.1039/d2dt00899h), 2022-01-01
Supplement: d2dt00899h1.pdf [file d2dt00899h1.pdf]

## Supporting Information

### Slow magnetic relaxation in a trigonal-planar mononuclear Fe(II) complex

Yuzhu Li,<sup>a‡</sup> Jing Xi,<sup>a‡</sup> Jesús Ferrando-Soria,<sup>b</sup> Yi-Quan Zhang,<sup>c\*</sup> Wenyuan Wang,<sup>d</sup> You Song,<sup>e</sup> Yan Guo,<sup>a\*</sup> Emilio Pardo<sup>b</sup> and Xiangyu Liu<sup>a,e\*</sup>

<sup>a</sup> State Key Laboratory of High-efficiency Utilization of Coal and Green Chemical Engineering, College of Chemistry and Chemical Engineering, Ningxia University, Yinchuan 750021, China.

<sup>b</sup> Departamento de Química Inorgánica, Instituto de Ciencia Molecular (ICMOL), Universidad de Valencia, Paterna 46980, Valencia, Spain.

<sup>c</sup> Jiangsu Key Laboratory for NSLSCS, School of Physical Science and Technology, Nanjing Normal University, Nanjing 210023, China.

<sup>d</sup> College of Chemistry and Materials Science, Northwest University, Xi'an, Shaanxi 710069, China.

<sup>e</sup> State Key Laboratory of Coordination Chemistry, Nanjing University, Nanjing 210046, China

‡ These authors contributed equally to this work.

#### \*Corresponding author

**Dr. Xiangyu Liu**

**E-mail: [xiangyuli432@126.com](mailto:xiangyuli432@126.com)**

#### \*Corresponding author

**Dr. Yan Guo**

**E-mail: [452785231@qq.com](mailto:452785231@qq.com)**

#### \*Corresponding author

**Prof. Yi-Quan Zhang**

**E-mail: [zhangyiquan@njnu.edu.cn](mailto:zhangyiquan@njnu.edu.cn)**

## Contents:

**Table S1.** Selected crystallographic data and structure refinement for complexes **1-2**.

**Table S2.** Selected Bond Lengths (Å) and Bond Angles (°) for **1**.

**Table S3.** Selected Bond Lengths (Å) and Bond Angles (°) for **2**.

**Table S4.** Relaxation fitting parameters from least-squares fitting of  $\chi(f)$  data under 1500 Oe dc field of **2**.

**Table S5.** Contributions of the excited states (with relative energy  $\text{cm}^{-1}$ ) to  $D$  value ( $\text{cm}^{-1}$ ) for **2** using CASSCF/RASSI-SO with ORCA 4.2.

**Table S6.** Relative energies ( $\text{cm}^{-1}$ ) of ligand field one-electron states (in the basis of d-AOs) of **1a**, **1b**, and **2** from AILFT analysis using CASSCF/RASSI-SO with ORCA 4.2.

**Fig. S1**  $^1\text{H}$  NMR spectrum of **2** in benzene- $d_6$ .

**Fig. S2** Packing arrangement of **1** along the crystallographic  $b$  axis.

**Fig. S3** Packing arrangement of **2** along the crystallographic  $b$  axis.

**Fig. S4** PXRD patterns for complex **2**.

**Fig. S5** Plots of  $\chi_m T$  vs  $T$  for complex **1**.

**Fig. S6** Plots of  $M$  vs  $H$  curves for **2** at different temperatures.

**Fig. S7** Temperature dependence of  $\chi'_M$  and  $\chi''_M$  susceptibilities for **1** and **2** without static field.

**Fig. S8** The  $\chi''_M$  products for **2** at 2 K under different static fields.

**Fig. S9** Temperature dependence of  $\chi'_M$  and  $\chi''_M$  susceptibilities for complex **2** under a 1500 Oe dc field.

**Fig. S10** Frequency dependence of the  $\chi'_M$  susceptibility signals for complex **2** under a 1500 Oe dc field.

**Fig. S11** Orbital energies computed for the ground state of **2** using CASSCF/RASSI-SO with ORCA 4.2.

**Fig. S12** Calculated orientations of the local main magnetic axes (green:  $g_z$ ) on  $\text{Fe}^{\text{III}}$

ions of complexes **1** in their ground spin-orbit states.

**Table S1.** Selected crystallographic data and structure refinement for complexes **1-2**.

| Complex                                            | <b>1</b>                                                          | <b>2</b>                                                          |
|----------------------------------------------------|-------------------------------------------------------------------|-------------------------------------------------------------------|
| Empirical formula                                  | C <sub>45</sub> H <sub>49</sub> N <sub>2</sub> Cl <sub>2</sub> Fe | C <sub>45</sub> H <sub>49</sub> ClFeN <sub>2</sub>                |
| Formula weight                                     | 744.61                                                            | 709.16                                                            |
| Temperature                                        | 153.15                                                            | 153.15                                                            |
| Crystal system                                     | triclinic                                                         | orthorhombic                                                      |
| Space group                                        | <i>P</i> $\bar{1}$                                                | <i>Pnma</i>                                                       |
| <i>a</i> (Å)                                       | 12.604(2)                                                         | 12.3687(7)                                                        |
| <i>b</i> (Å)                                       | 16.344(3)                                                         | 22.9892(10)                                                       |
| <i>c</i> (Å)                                       | 20.239(4)                                                         | 13.9721(6)                                                        |
| $\alpha$ (°)                                       | 94.765(7)                                                         | 90                                                                |
| $\beta$ (°)                                        | 92.058(6)                                                         | 90                                                                |
| $\gamma$ (°)                                       | 109.136(6)                                                        | 90                                                                |
| <i>V</i> (Å <sup>3</sup> )                         | 3916.2(12)                                                        | 3972.9(3)                                                         |
| <i>Z</i>                                           | 4                                                                 | 4                                                                 |
| <i>D</i> (g/cm <sup>3</sup> )                      | 1.263                                                             | 1.186                                                             |
| <i>Mu</i> (mm <sup>-1</sup> )                      | 0.555                                                             | 0.479                                                             |
| <i>F</i> (0 0 0)                                   | 1572.0                                                            | 1504.0                                                            |
| Completeness                                       | 99.4                                                              | 99.9                                                              |
| Unique reflections                                 | 16093                                                             | 4187                                                              |
| Observed reflections                               | 47592                                                             | 75142                                                             |
| <i>R</i> <sub>int</sub>                            | 0.0421                                                            | 0.1450                                                            |
| Final <i>R</i> indices[ <i>I</i> > 2σ( <i>I</i> )] | <i>R</i> <sub>1</sub> = 0.0378<br><i>wR</i> <sub>2</sub> = 0.0863 | <i>R</i> <sub>1</sub> = 0.0598<br><i>wR</i> <sub>2</sub> = 0.1777 |
| <i>R</i> indices (all data)                        | <i>R</i> <sub>1</sub> = 0.0567<br><i>wR</i> <sub>2</sub> = 0.0933 | <i>R</i> <sub>1</sub> = 0.0854<br><i>wR</i> <sub>2</sub> = 0.1932 |
| Goodness-of-fit on <i>F</i> <sup>2</sup>           | 1.016                                                             | 1.044                                                             |

**Table S2.** Selected Bond Lengths (Å) and Bond Angles (°) for **1**

| <b>1</b>          |            |                        |              |
|-------------------|------------|------------------------|--------------|
| C(1)-N(2)         | 1.323(2)   | C(1)-N(2)-Fe(1)        | 117.84(12)   |
| C(3)-N(1)         | 1.351(2)   | C(22)-N(2)-Fe(1)       | 120.46(12)   |
| C(22)-N(2)        | 1.460(2)   | N(4)-C(46)-C(47)       | 123.59(16)   |
| C(34)-N(1)        | 1.457(2)   | N(4)-C(46)-C(61)       | 118.52(16)   |
| Cl(1)-Fe(1)       | 2.1970(7)  | N(3)-C(48)-C(47)       | 123.64(17)   |
| Cl(2)-Fe(1)       | 2.1825(7)  | N(3)-C(48)-C(49)       | 118.90(16)   |
| Fe(1)-N(1)        | 1.9432(17) | C(68)-C(67)-N(4)       | 119.92(17)   |
| Fe(1)-N(2)        | 1.9837(16) | Cl(4)-Fe(2)-Cl(3)      | 115.31(3)    |
| C(46)-N(4)        | 1.333(2)   | N(3)-Fe(2)-Cl(3)       | 104.77(5)    |
| C(48)-N(3)        | 1.350(2)   | N(3)-Fe(2)-Cl(4)       | 117.96(5)    |
| C(67)-N(4)        | 1.463(2)   | N(3)-Fe(2)-N(4)        | 94.63(7)     |
| C(79)-N(3)        | 1.457(2)   | N(4)-Fe(2)-Cl(3)       | 108.50(5)    |
| Cl(3)-Fe(2)       | 2.2052(7)  | N(4)-Fe(2)-Cl(4)       | 113.43(5)    |
| Cl(4)-Fe(2)       | 2.1810(7)  | C(48)-N(3)-C(79)       | 119.74(15)   |
| Fe(2)-N(3)        | 1.9511(16) | C(48)-N(3)-Fe(2)       | 113.(79)(13) |
| Fe(2)-N(4)        | 1.9832(16) | C(79)-N(3)-Fe(2)       | 125.64(12)   |
| N(2)-C(1)-C(2)    | 123.78(17) | C(46)-N(4)-C(67)       | 119.53(15)   |
| N(2)-C(1)-C(16)   | 120.66(17) | C(46)-N(4)-Fe(2)       | 115.76(12)   |
| N(1)-C(3)-C(2)    | 122.98(17) | C(67)-N(4)-Fe(2)       | 122.89(11)   |
| N(1)-C(3)-C(4)    | 119.59(16) | C(2)-C(1)-N(2)-Fe(1)   | 3.8(2)       |
| C(23)-C(22)-N(2)  | 118.55(17) | C(2)-C(3)-N(1)-Fe(1)   | 32.9(2)      |
| C(27)-C(22)-N(2)  | 120.18(18) | C(4)-C(3)-N(1)-Fe(1)   | 146.76(14)   |
| C(35)-C(34)-N(1)  | 117.22(18) | C(16)-C(1)-N(2)-Fe(1)  | 178.58(13)   |
| C(39)-C(34)-N(1)  | 120.61(18) | C(23)-C(22)-N(2)-Fe(1) | 77.4(2)      |
| Cl(2)-Fe(1)-Cl(1) | 116.10(3)  | C(27)-C(22)-N(2)-Fe(1) | 99.18(19)    |
| N(1)-Fe(1)-Cl(1)  | 107.32(5)  | C(35)-C(34)-N(1)-Fe(1) | 96.83(19)    |
| N(1)-Fe(1)-Cl(2)  | 114.28(5)  | C(39)-C(34)-N(1)-Fe(1) | 83.5(2)      |
| N(1)-Fe(1)-N(2)   | 94.63(7)   | C(47)-C(46)-N(4)-Fe(2) | 16.0(2)      |
| N(2)-Fe(1)-Cl(1)  | 109.16(5)  | C(49)-C(48)-N(3)-Fe(2) | 148.75(14)   |
| N(2)-Fe(1)-Cl(2)  | 113.18(5)  | C(61)-C(46)-N(4)-Fe(2) | 166.24(13)   |
| C(3)-N(1)-C(34)   | 119.11(16) | C(68)-C(67)-N(4)-Fe(2) | 97.06(19)    |
| C(3)-N(1)-Fe(1)   | 114.86(13) | C(72)-C(67)-N(4)-Fe(2) | 81.62(19)    |
| C(34)-N(1)-Fe(1)  | 123.44(12) | C(80)-C(79)-N(3)-Fe(2) | 112.05(18)   |
| C(1)-N(2)-C(22)   | 121.69(16) | C(84)-C(79)-N(3)-Fe(2) | 65.2(2)      |

**Table S3.** Selected Bond Lengths (Å) and Bond Angles (°) for **2**

| 2                               |            |                                |            |
|---------------------------------|------------|--------------------------------|------------|
| Fe(1)-Cl(1)                     | 2.1860(15) | C1 <sup>1</sup> -C(2)-C(1)     | 125.7(3)   |
| Fe(1)-N(1)                      | 1.960(2)   | C1-C(2)-C(25)                  | 117.13(17) |
| Fe(1)-N(1) <sup>1</sup>         | 1.960(2)   | C(1) <sup>1</sup> -C(2)-C(25)  | 117.13(13) |
| N(1)-C(1)                       | 1.329(3)   | Fe(1)-N(1)-C(1)-C2             | -3.9(4)    |
| N(1)-C(10)                      | 1.449(3)   | Fe(1)-N(1)-C(1)-C(19)          | 178.0(6)   |
| C(1)-C(2)                       | 1.413(3)   | Fe(1)-N(1)-C(10)-C(11)         | -86.1(3)   |
| C(1)-C(19)                      | 1.473(9)   | Fe(1)-N(1)-C(10)-C(15)         | 89.9(3)    |
| C(1)-C(19A)                     | 1.547(10)  | N(1)-C(1)-C2-C(1) <sup>1</sup> | -0.5(6)    |
| C(2)-C(25)                      | 1.513(5)   | N(1)-C(1)-C2-C25               | -179.8(3)  |
| N(1)-Fe(1)-Cl(1)                | 133.60(7)  | N(1)-C(1)-C(19)-C20            | -103.3(8)  |
| N(1)A <sup>1</sup> -Fe(1)-Cl(1) | 133.60(7)  | N(1)-C(1)-C(19)-C24            | 80.3(8)    |
| N(1)A <sup>1</sup> -Fe(1)-N(1)  | 92.80(13)  | N(1)-C(1)-C(19A)-C(24A)        | 89.1(9)    |
| C(1)-N(1)-Fe(1)                 | 126.46(18) | N(1)-C(1)-C(19A)-C(20A)        | -91.9(8)   |
| C(1)-N(1)-C(10)                 | 120.4(2)   | N(1)-C(10)-C(11)-C(8)          | -0.8(4)    |
| C(10)-N(1)-Fe(1)                | 113.02(17) | N(1)-C(10)-C(11)-C(12)         | 177.4(3)   |
| N(1)-C(1)-C(2)                  | 124.1(2)   | N(1)-C(10)-C(15)-C(14)         | -178.5(3)  |
| N(1)-C(1)-C(19)                 | 118.8(5)   | N(1)-C(10)-C(15)-C(17)         | -1.2(4)    |
| N(1)-C(1)-C(19A)                | 118.5(7)   | C(1)-N(1)-C(10)-C(11)          | 89.4(3)    |

<sup>1</sup>+X,1/2-Y,+Z

**Table S4.** Relaxation fitting parameters from least-squares fitting of  $\chi(f)$  data under 1500 Oe dc field of **2**.

| T(K) | $\chi_T$ | $\chi_s$              | $\alpha$              |
|------|----------|-----------------------|-----------------------|
| 3    | 0.435    | $1.95 \times 10^{-2}$ | 0.193                 |
| 3.5  | 0.403    | $2.10 \times 10^{-2}$ | 0.185                 |
| 4    | 0.363    | $2.22 \times 10^{-2}$ | 0.171                 |
| 4.5  | 0.331    | $2.24 \times 10^{-2}$ | 0.162                 |
| 5    | 0.302    | $2.36 \times 10^{-2}$ | 0.143                 |
| 5.2  | 0.291    | $2.41 \times 10^{-2}$ | 0.134                 |
| 5.5  | 0.276    | $2.44 \times 10^{-2}$ | 0.122                 |
| 5.8  | 0.263    | $2.42 \times 10^{-2}$ | 0.112                 |
| 6    | 0.254    | $2.51 \times 10^{-2}$ | 0.100                 |
| 6.2  | 0.247    | $2.41 \times 10^{-2}$ | $9.73 \times 10^{-2}$ |
| 6.5  | 0.236    | $2.43 \times 10^{-2}$ | $8.45 \times 10^{-2}$ |
| 6.8  | 0.226    | $2.30 \times 10^{-2}$ | $7.68 \times 10^{-2}$ |
| 7    | 0.220    | $2.32 \times 10^{-2}$ | $6.82 \times 10^{-2}$ |
| 7.2  | 0.214    | $2.33 \times 10^{-2}$ | $5.92 \times 10^{-2}$ |
| 7.5  | 0.206    | $2.15 \times 10^{-2}$ | $5.12 \times 10^{-2}$ |
| 7.8  | 0.198    | $1.87 \times 10^{-2}$ | $4.48 \times 10^{-2}$ |
| 8    | 0.194    | $1.62 \times 10^{-2}$ | $4.59 \times 10^{-2}$ |
| 8.5  | 0.183    | $1.48 \times 10^{-2}$ | $4.61 \times 10^{-2}$ |
| 9    | 0.174    | $1.44 \times 10^{-2}$ | $4.31 \times 10^{-2}$ |
| 9.5  | 0.165    | $1.05 \times 10^{-2}$ | $3.79 \times 10^{-2}$ |
| 10   | 0.156    | $8.85 \times 10^{-3}$ | $4.67 \times 10^{-2}$ |
| 11   | 0.143    | $7.58 \times 10^{-3}$ | $4.11 \times 10^{-2}$ |
| 12   | 0.132    | $6.35 \times 10^{-3}$ | $4.25 \times 10^{-2}$ |

**Table S5.** Contributions of the excited states (with relative energy  $\text{cm}^{-1}$ ) to  $D$  value ( $\text{cm}^{-1}$ ) for **2** using CASSCF/RASSI-SO with ORCA 4.2.

|          | State No. | Mult | Energy, $\text{cm}^{-1}$ | Contribution, $\text{cm}^{-1}$<br>$D$ |
|----------|-----------|------|--------------------------|---------------------------------------|
| <b>2</b> | 1         | 5    | 238.9                    | -61.8                                 |
|          | 2         | 5    | 2708.3                   | 4.3                                   |

**Table S6.** Relative energies ( $\text{cm}^{-1}$ ) of ligand field one-electron states (in the basis of d-AOs) of **1a**, **1b** and **2** from AILFT analysis using CASSCF/RASSI-SO with ORCA 4.2.

|           | No. | LF one-electron state                            | Energy, $\text{cm}^{-1}$ |
|-----------|-----|--------------------------------------------------|--------------------------|
| <b>1a</b> | 1   | $0.85 d_{xz} + 0.48 d_{x^2-y^2} + 0.14 d_{xy}$   | 0.0                      |
|           | 2   | $-0.81 d_{x^2-y^2} + 0.51 d_{xz} - 0.26 d_{yz}$  | 307.6                    |
|           | 3   | $-0.82 d_{z^2} + 0.57 d_{yz}$                    | 5381.5                   |
|           | 4   | $-0.76 d_{yz} - 0.55 d_{z^2} + 0.32 d_{x^2-y^2}$ | 6720.5                   |
|           | 5   | $-0.98 d_{xy} + 0.14 d_{z^2}$                    | 9540.5                   |
| <b>1b</b> | 1   | $-0.69 d_{xy} - 0.62 d_{xz} - 0.24 d_{yz}$       | 0.0                      |
|           | 2   | $-0.56 d_{xz} + 0.55 d_{yz} + 0.55 d_{x^2-y^2}$  | 781.9                    |
|           | 3   | $-0.91 d_{z^2} - 0.34 d_{yz} - 0.13 d_{xz}$      | 5161.3                   |
|           | 4   | $0.76 d_{x^2-y^2} - 0.62 d_{yz}$                 | 6724.8                   |
|           | 5   | $-0.69 d_{xy} + 0.51 d_{xz} + 0.37 d_{yz}$       | 9505.8                   |
| <b>2</b>  | 1   | $-0.99 d_{yz}$                                   | 0.0                      |
|           | 2   | $0.98 d_{z^2} + 0.20 d_{x^2-y^2}$                | 44.5                     |
|           | 3   | $-0.99 d_{xz}$                                   | 2398.1                   |
|           | 4   | $0.98 d_{x^2-y^2} - 0.20 d_{z^2}$                | 4255.2                   |
|           | 5   | $-0.99 d_{xy}$                                   | 11310.9                  |



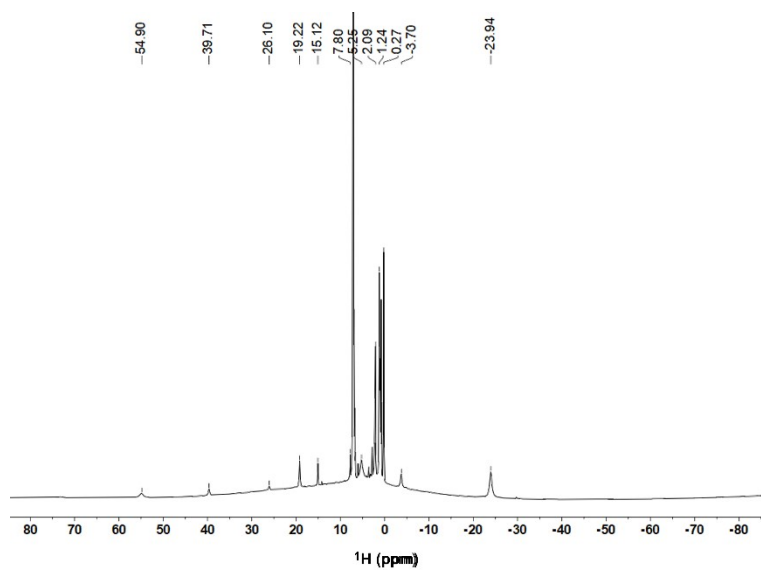

**Fig. S1**  $^1\text{H}$  NMR spectrum of **2** in benzene- $d_6$ .

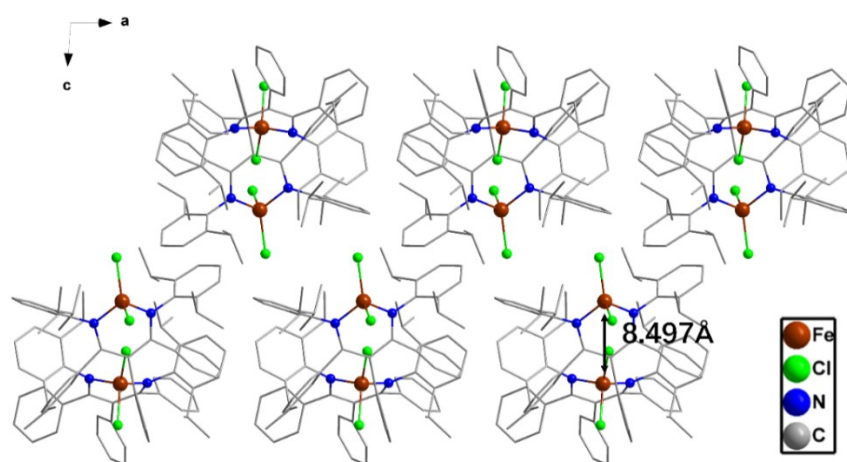

**Fig. S2** Packing arrangement of **1** along the crystallographic  $b$  axis.

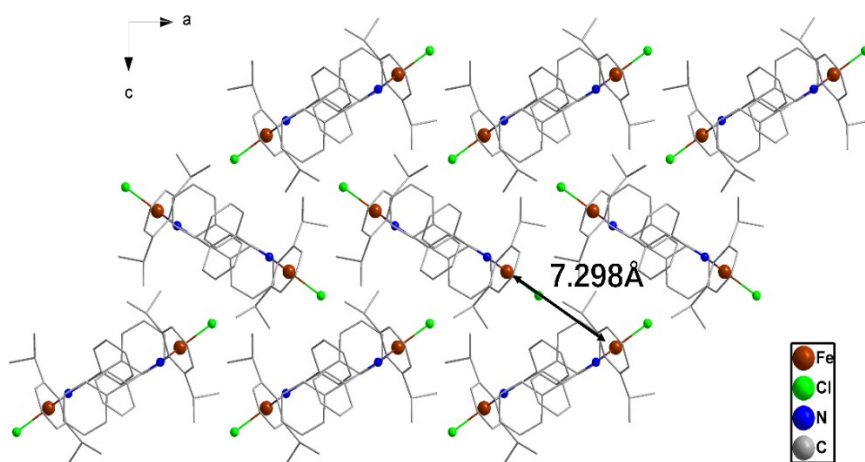

**Fig. S3** Packing arrangement of **2** along the crystallographic  $b$  axis.

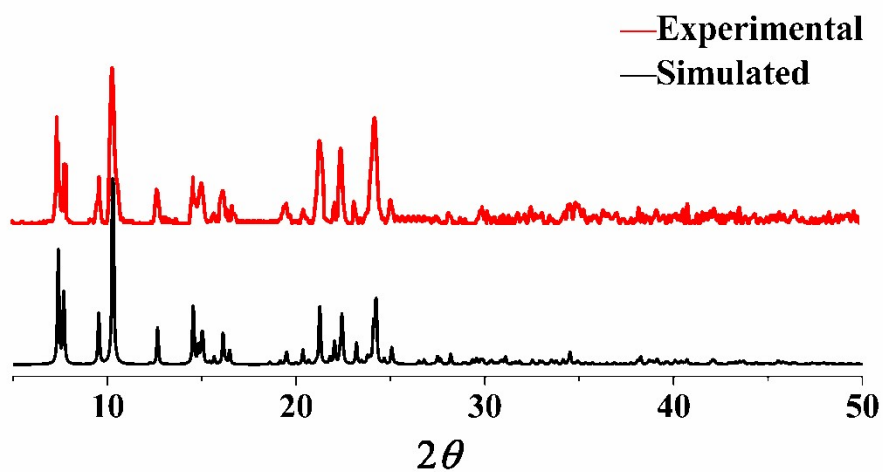

**Fig. S4** PXRD patterns for complex 2.

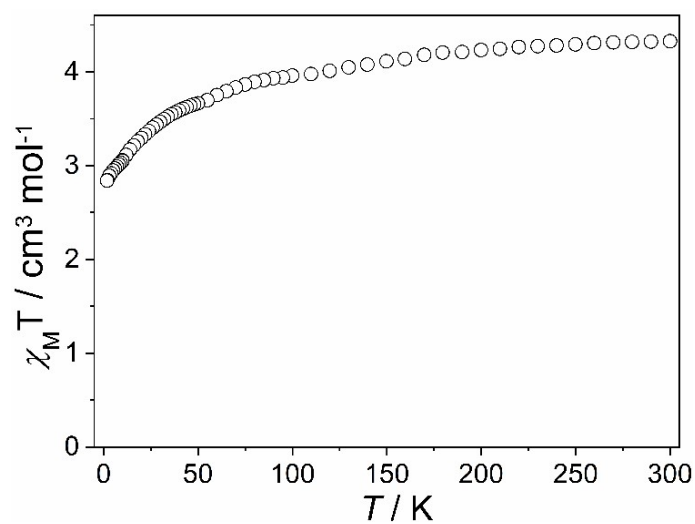

**Fig. S5** Plots of  $\chi_m T$  versus  $T$  for complex 1.

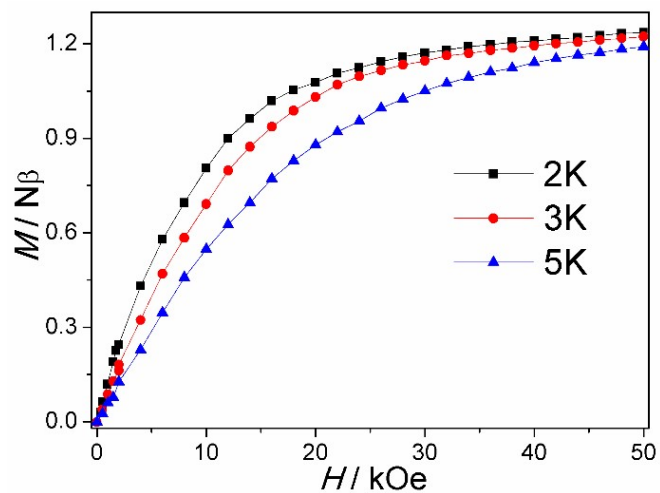

**Fig. S6** Plots of  $M$  vs  $H$  curves for 2 at different temperatures. The solid lines represent fits to the data.

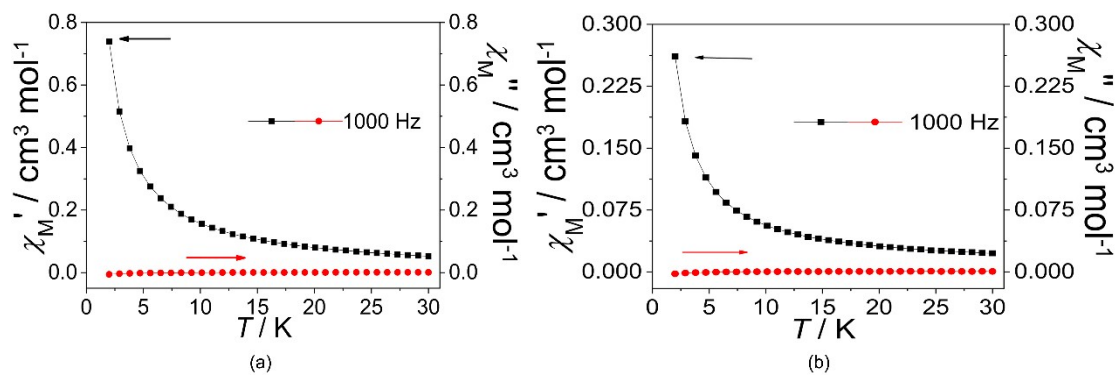

**Fig. S7** Temperature dependence of  $\chi'_M$  and  $\chi''_M$  susceptibilities for **1** and **2** without static field.

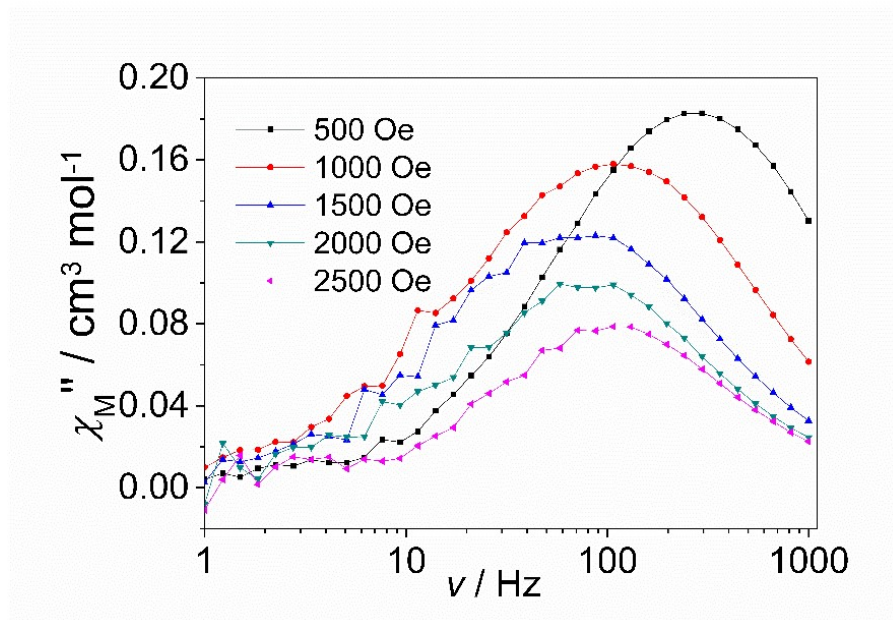

**Fig. S8** The  $\chi''_M$  for **2** at 2 K under different static fields.

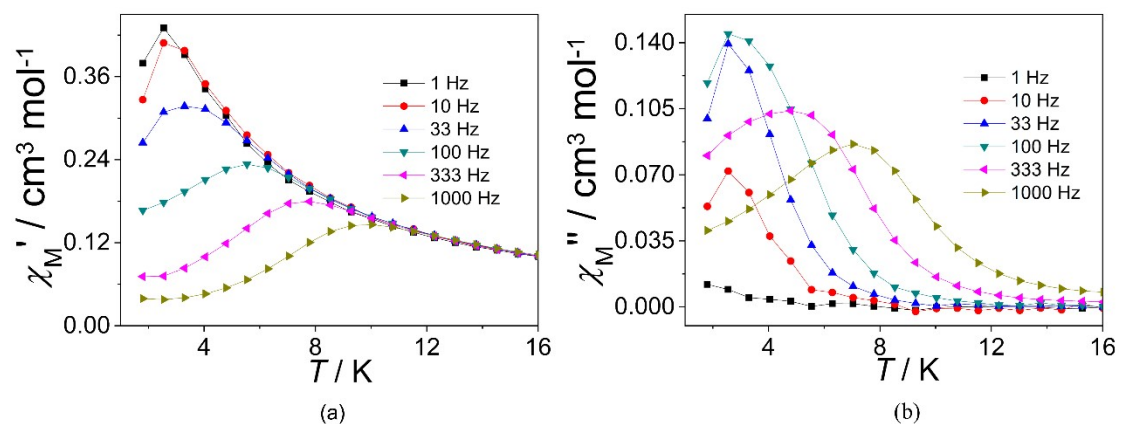

**Fig. S9** Temperature dependence of  $\chi'_M$  and  $\chi''_M$  susceptibilities for complex **2** under a 1500 Oe dc field.

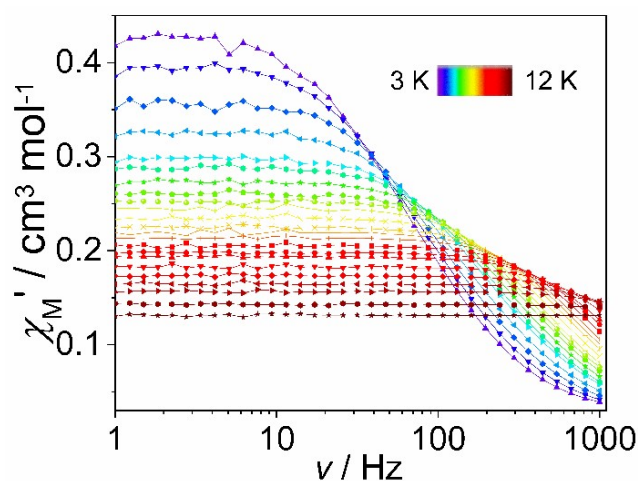

**Fig. S10** Frequency dependence of the  $\chi'_M$  susceptibility signals for complex **2** under a 1500 Oe dc field.

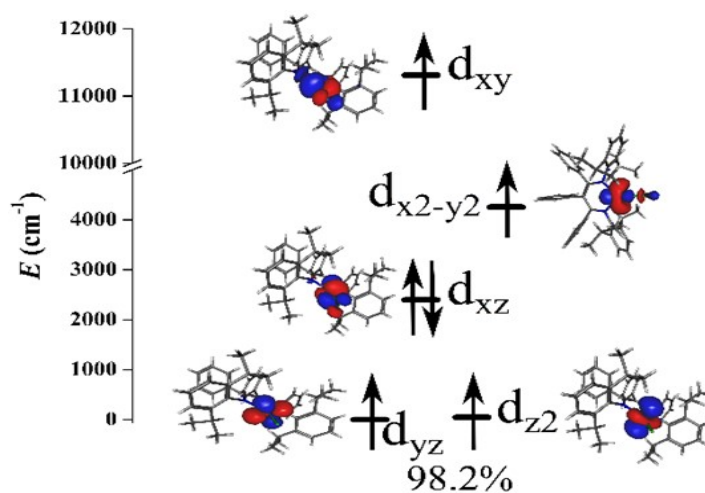

**Fig. S11** Orbital energies computed for the ground state of **2** using CASSCF/RASSI-SO with ORCA 4.2. The percentage mention reveals the percent of the corresponding configuration mixing.

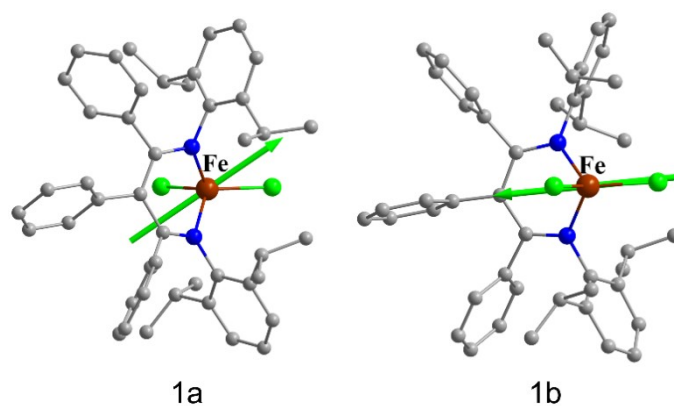

**Fig. S12** Calculated orientations of the local main magnetic axes (green:  $g_z$ ) on  $\text{Fe}^{\text{III}}$  ions of complexes **1** in their ground spin-orbit states.
